# Supplementary material
Source: Research Square preprint supplement (doi:10.21203/rs.3.rs-9113639/v1)
Supplement: Supplementary file 1 [file a5cc7e6fed42d554f714fbdd.docx]

**Table S1.** Summary of the results of the generalized linear mixed model (GLMM) fit by maximum likelihood (Laplace Approximation) for explaining the leaf damage by tomato leaf miner.

| **Fixed effects** | **Estimate** | **Std. Error** | **z value** | **Pr(>|z|)** | **AIC** | **BIC** |
| --- | --- | --- | --- | --- | --- | --- |
| (Intercept) | 0.497610 | 0.083642 | 5.949 | 2.69e-09 *** | 6667.4 | 6863.4 |
| Cypermethrin | -0.164141 | 0.099940 | -1.642 | 0.100507 |
| Dudu acelamectin | -0.260534 | 0.102638 | -2.538 | 0.011137 * |
| Lambda cyhalothrin | -0.428670 | 0.107813 | -3.976 | 7.01e-05 *** |
| Nimbecidine | -0.501695 | 0.110260 | -4.550 | 5.36e-06 *** |
| Occasion Star® 200SC | -0.532468 | 0.111326 | -4.783 | 1.73e-06 *** |
| *Tephrosia vogelii* | -0.648300 | 0.115556 | -5.610 | 2.02e-08 *** |
| Tovi star F1 | -0.457243 | 0.108749 | -4.205 | 2.62e-05 *** |
| Rainy season | 0.009129 | 0.095534 | 0.096 | 0.923872 |
| Day 3 | 0.118879 | 0.061012 | 1.948 | 0.051363 . |
| Day 5 | 0.234519 | 0.059425 | 3.946 | 7.93e-05 *** |
| Day 7 | 0.374077 | 0.057690 | 6.484 | 8.92e-11 *** |
| Day 10 | 0.572772 | 0.055532 | 10.314 | < 2e-16 *** |
| Cypermethrin:Tovi star F1 | -0.026914 | 0.161242 | -0.167 | 0.867433 |
| Dudu acelamectin:Tovi star F1 | -0.071600 | 0.166948 | -0.429 | 0.668013 |
| Lambda cyhalothrin:Tovi star F1 | 0.012275 | 0.172772 | 0.071 | 0.943360 |
| Nimbecidine:Tovi star F1 | 0.274922 | 0.168774 | 1.629 | 0.103327 |
| Occasion Star® 200SC Tovi star F1 | 0.024055 | 0.177980 | 0.135 | 0.892490 |
| *Tephrosia vogelii*:Tovi star F1 | 0.064853 | 0.183237 | 0.354 | 0.723390 |
| Cypermethrin: Rainy season | -0.239053 | 0.146048 | -1.637 | 0.101671 |
| Dudu acelamectin: Rainy season | -0.345600 | 0.152991 | -2.259 | 0.023886 * |
| Lambda cyhalothrin: Rainy season | -0.570508 | 0.168835 | -3.379 | 0.000727 *** |
| Nimbecidine: Rainy season | -0.219102 | 0.161372 | -1.358 | 0.174546 |
| Occasion Star® 200SC: Rainy season | -0.307278 | 0.165699 | -1.854 | 0.063678 . |
| *Tephrosia vogelii*: Rainy season | -0.482645 | 0.178811 | -2.699 | 0.006951 ** |
| Tovi star F1: Rainy season | -0.124200 | 0.156503 | -0.794 | 0.427429 |
| Cypermethrin:Tovi star F1: Rainy season | 0.421948 | 0.231652 | 1.821 | 0.068535 . |
| Dudu acelamectin:Tovi star F1: Rainy season | 0.429900 | 0.243471 | 1.766 | 0.077443 . |
| Lambda cyhalothrin:Tovi star F1: Rainy season | 0.739069 | 0.255476 | 2.893 | 0.003817 ** |
| Nimbecidine:Tovi star F1: Rainy season | 0.287653 | 0.244965 | 1.174 | 0.240290 |
| Occasion Star® 200SC:Tovi star F1: Rainy season | 0.567857 | 0.255490 | 2.223 | 0.026241 * |
| *Tephrosia vogelii*:Tovi star F1: Rainy season | 0.597715 | 0.270735 | 2.208 | 0.027262 * |

Signif. codes : 0 ‘***’ 0.001 ‘**’ 0.01 ‘*’ 0.05 ‘.’ 0.1 ‘ ’ 1
